# Supplementary material for: Treatment and Survival of Malignant Extracranial Germ Cell Tumours in the Paediatric Population: A Systematic Review and Meta-Analysis
Source: MDPI journal article supplement (doi:10.3390/cancers13143561), 2021-07-16
Supplement: s1 [file s1]

## **Appendix 1: Full search strategy in Pubmed and Embase**

### **Pubmed full search**

- #1 (((tumor[Title/Abstract] OR tumors[Title/Abstract] OR tumour[Title/Abstract] OR tumours[Title/Abstract])))
- #2 ((Embryonal [Title/Abstract] OR Chordoma\* [Title/Abstract] OR Germinoma\* [Title/Abstract] OR Dysgerminoma\* [Title/Abstract] OR Seminoma\*[Title/Abstract] OR Gonadoblastoma\*[Title/Abstract] OR Mesonephroma\*[Title/Abstract] OR Endodermal Sinus [Title/Abstract] OR Teratocarcinoma\*[Title/Abstract] OR Teratocarcinosarcoma\*[Title/Abstract] OR Teratoma\*[Title/Abstract] OR Dermoid\*[Title/Abstract] OR Struma ovarii[Title/Abstract] OR Trophoblastic neoplasm\*[Title/Abstract] OR Choriocarcinoma\* [Title/Abstract] OR Gestational trophoblastic disease\*[Title/Abstract] OR Germ Cell\*[Title/Abstract]))
- #3 #1 AND #2
- #4 ("Neoplasms, Germ Cell and Embryonal"[Mesh])
- #5 #3 OR #4
- #6 ((Radia\*[Title/Abstract] OR Radiotherap\*[Title/Abstract] OR Drug therapy[Title/Abstract] OR Drug therapie\*[Title/Abstract] OR adjuvant drug therap\*[Title/Abstract] OR chemotherap\*[Title/Abstract] OR chemoradi\*[Title/Abstract] OR

Operation[Title/Abstract] OR Operative[Title/Abstract] OR procedure\*[Title/Abstract] OR Surgery[Title/Abstract] OR  
Surgical[Title/Abstract] OR Treatment\*[Title/Abstract] OR Therapy[Title/Abstract] OR Therapies[Title/Abstract] OR  
Neoadjuvant Therap\*[Title/Abstract] OR Neoadjuvant Treatment\*[Title/Abstract]))

#7 (((("Surgical Procedures, Operative"[Mesh]) OR "Radiotherapy"[Mesh]) OR "Chemotherapy, Adjuvant"[Mesh]) OR  
"Neoadjuvant Therapy"[Mesh]))

#8 #6 OR #7

#9 (((Disease-free survival[Title/Abstract] OR DFS[Title/Abstract] OR Progression free survival[Title/Abstract] OR Response  
Evaluation Criteria in Solid Tumors[Title/Abstract] OR Treatment failure[Title/Abstract] OR Survival[Title/Abstract] OR  
Outcome\*[Title/Abstract] OR Complication\*[Title/Abstract])))

#10 "Treatment Outcome"[Mesh]

#11 #9 OR #10

#12 #5 AND #8 AND #11

#13 #12 NOT ("animals"[MeSH Terms] NOT "humans"[MeSH Terms])

FILTER:

- Child: birth-18 years
- Publication dates: from 2000+
- English articles
- Humans

*Last performed: 28th of February 2019*

*Total of 10697 results*

### **Embase full search**

#1 (((tumor:ti,ab,kw OR tumors:ti,ab,kw OR tumour:ti,ab,kw OR tumours:ti,ab,kw)))

#2 ((Embryonal:ti,ab,kw OR Chordoma\*:ti,ab,kw OR Germinoma\*:ti,ab,kw OR Dysgerminoma\*:ti,ab,kw OR Seminoma\*:ti,ab,kw OR Gonadoblastoma\*:ti,ab,kw OR Mesonephroma\*:ti,ab,kw OR 'Endodermal Sinus':ti,ab,kw OR Teratocarcinoma\*:ti,ab,kw OR Teratocarcinosarcoma\*:ti,ab,kw OR Teratoma\*:ti,ab,kw OR Dermoid\*:ti,ab,kw OR 'Struma ovarii':ti,ab,kw OR 'Trophoblastic neoplasm\*':ti,ab,kw OR Choriocarcinoma\*:ti,ab,kw OR 'Gestational trophoblastic disease\*':ti,ab,kw OR 'Germ Cell\*':ti,ab,kw))

- #3 #1 AND #2
- #4 'germ cell cancer'/exp
- #5 #3 OR #4
- #6 ((Radia\*:ti,ab,kw OR Radiotherap\*:ti,ab,kw OR 'Drug therapy':ti,ab,kw OR 'Drug therapie\*':ti,ab,kw OR 'adjuvant drug therap\*':ti,ab,kw OR chemotherap\*:ti,ab,kw OR chemoradi\*:ti,ab,kw OR Operation:ti,ab,kw OR Operative:ti,ab,kw OR procedure\*:ti,ab,kw OR Surgery:ti,ab,kw OR Surgical:ti,ab,kw OR Treatment\*:ti,ab,kw OR Therapy:ti,ab,kw OR Therapies:ti,ab,kw OR 'Neoadjuvant Therap\*':ti,ab,kw OR 'Neoadjuvant Treatment\*':ti,ab,kw))
- #7 'surgery'/exp OR 'radiotherapy'/exp OR 'chemotherapy'/exp OR 'neoadjuvant therapy'/exp
- #8 #6 OR #7
- #9 (((('Disease-free survival':ti,ab,kw OR DFS:ti,ab,kw OR 'Progression free survival':ti,ab,kw OR 'Response Evaluation Criteria in Solid Tumors':ti,ab,kw OR 'Treatment failure':ti,ab,kw OR Survival:ti,ab,kw OR Outcome\*:ti,ab,kw OR Complication\*:ti,ab,kw))))
- #10 'treatment outcome'/exp
- #11 #9 OR #10

#12 #5 AND #8 AND #11

FILTER:

- Child: birth-18 years
- Publication dates: from 2000+
- English articles
- Humans
- Publication type: Article

Source: Embase and overlapping with medline

*Last performed: 28th of February 2019*

*Total of 1859 results*

**Appendix 2: Quality assessment of the included articles based on the STROBE Statement (articles 1-16)**

| STROBE-<br>item | Akyüz<br>2000 | Baranzelli<br>2000 | Schneider<br>2000 | Mann<br>2000 | Terenziani<br>2001 | Stern<br>2002 | Suita<br>2002 | Terenziani<br>2002 | Billmire<br>2003 | Curto<br>2003 | Schlatter<br>2003 | Schneider<br>2003 | Billmire<br>2004 | Güler<br>2004 | Rogers<br>2004 | Marina<br>2006 |
|-----------------|---------------|--------------------|-------------------|--------------|--------------------|---------------|---------------|--------------------|------------------|---------------|-------------------|-------------------|------------------|---------------|----------------|----------------|
| 1a              | •             | •                  | ●                 | ●            | •                  | •             | •             | •                  | •                | •             | •                 | ●                 | •                | ●             | •              | •              |
| 1b              | •             | •                  | •                 | •            | •                  | •             | •             | •                  | •                | •             | •                 | •                 | •                | •             | •              | •              |
| 2               | •             | •                  | •                 | •            | •                  | •             | •             | •                  | ●                | •             | •                 | •                 | ●                | •             | •              | •              |
| 3               | ●             | ●                  | ●                 | ●            | ●                  | ●             | ●             | ●                  | ●                | ●             | ●                 | ●                 | ●                | ●             | ●              | ●              |
| 4               | •             | •                  | •                 | •            | •                  | •             | •             | •                  | •                | •             | •                 | •                 | •                | •             | •              | •              |
| 5               | •             | ●                  | •                 | ●            | ●                  | •             | •             | •                  | •                | •             | •                 | •                 | ●                | ●             | •              | •              |
| 6a              | ●             | •                  | •                 | ●            | ●                  | •             | •             | ●                  | •                | •             | •                 | •                 | ●                | ●             | •              | •              |



[illegible]

**STROBE Statement – Checklist of items that should be included in report of observational studies**

1. Title and abstract
  - a. Indicate the study's design with a commonly used term in the title or the abstract
  - b. Provide in the abstract an informative and balanced summary of what was done and what was found

2. Background/rationale: explain the scientific background and rationale for the investigation being reported

3. Objectives: state specific objectives, including any prespecified hypothesis

## **Methods**

4. Study design: present key element of study design early in the paper
5. Setting: describe the setting, locations, and relevant dates, including periods of recruitment, exposure, follow-up, and data-collection
6. Participants:
  - a. Give the eligibility criteria and the sources and methods of selection of participants. Describe methods of follow-up
  - b. For matched studies, give matching criteria and number of exposed and unexposed
7. Variables: clearly define all outcomes, exposures, predictors, potential confounders, and effect modifiers. Give diagnostic criteria, if applicable
8. Data sources/measurement: for each variable of interest, give sources of data and details of methods of assessment (measurement). Describe comparability of assessment methods if there is more than one group
9. Bias: describe any efforts to address potential sources of bias
10. Study size: explain how the study size was arrived at
11. Quantitative variables: explain how quantitative variables were handled in the analyses. If applicable, describe which grouping were chosen and why
12. Statistical methods;
  - a. Describe all statistical methods, including those used to control for confounding
  - b. Describe any methods used to examine subgroups and interactions
  - c. Explain how missing data were addressed
  - d. If applicable, explain how loss to follow-up was addressed
  - e. Describe any sensitivity analyses



## Results

### 13. Participants;

- a. Report numbers of individuals at each stage of study – eg numbers potentially eligible, examined for eligibility, confirmed eligible, included in the study, completing follow-up, and analysed
- b. Give reasons for non-participating at each stage
- c. Consider use of a flow diagram

### 14. Descriptive data;

- a. Give characteristics of study participants (eg demographic, clinical, social) and information on exposures and potential confounders
- b. Indicate number of participants with missing data for each variable of interest
- c. Summarise follow-up time (eg, average and total amount)

### 15. Outcome data: report numbers of outcome events or summary measures over time

### 16. Main results;

- a. Give unadjusted estimates and, if applicable, confounder-adjusted estimates and their precision (eg, 95% confidence interval). Make clear which confounders were adjusted for and why they were included
- b. Report category boundaries when continuous variable were categorized
- c. If relevant, consider translating estimates of relative risk into absolute risk for a meaningful time period

### 17. Other analyses: report other analyses done – eg analyses of subgroups and interactions, and sensitivity analyses

## Discussion

### 18. Key results: summarise key results with reference to study objectives

19. Limitations: discuss limitations of the study, taking into account sources of potential bias or imprecision. Discuss both direction and magnitude of any potential bias
20. Interpretation: give a cautious overall interpretation of results considering objectives, limitations, multiplicity of analyses, results from similar studies, and other relevant evidence
21. Generalizability: discuss the generalizability (external validity) of the study results

**Other information**

22. Funding: give the source of funding and the role of the funders for the present study and, if applicable, for the original study on which the present article is based
